# Supplementary material
Source: publisher figshare collection journal article supplement (https://karger.figshare.com/ndownloader/files/21239193)
Supplement: Supplementary file 1 [file 21239193]

**Supplementary Fig. 1**

**Association between AKI incidence and mortality by AKI severity in adult cohorts**

**
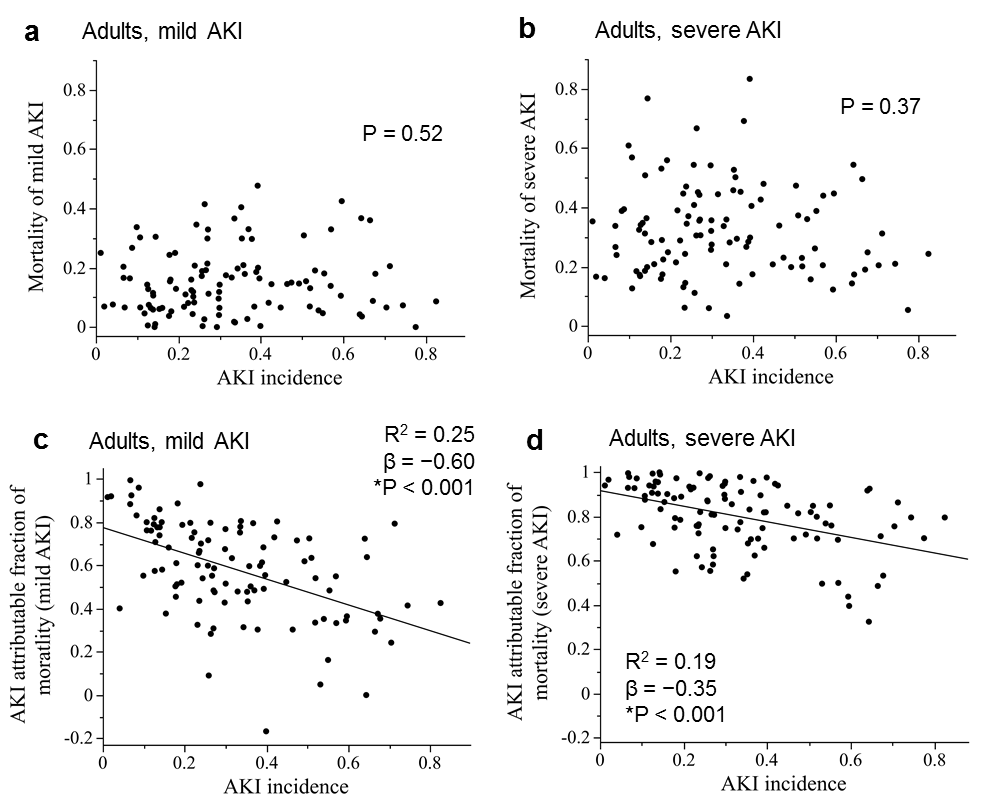
**

**Supplementary Fig. 2**

**Association between AKI incidence and mortality by AKI severity in paediatric cohorts**

**
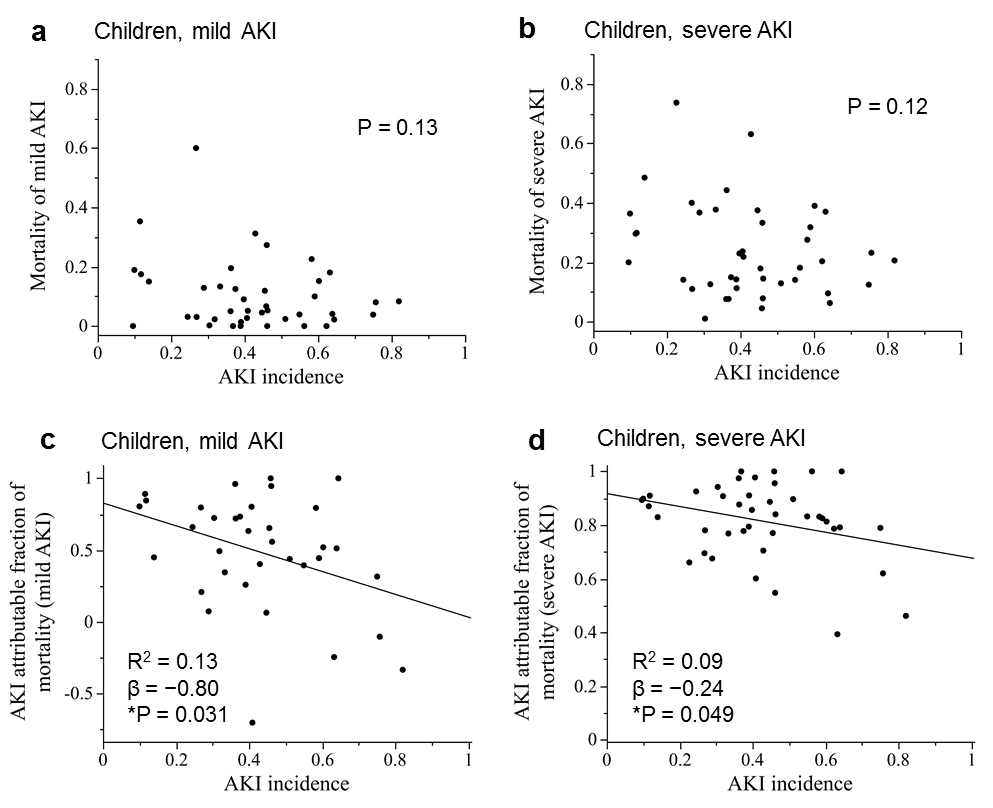
**

**Table S1. Search strategy of the systematic review**

| Search strategy of the systematic review (2004–2012/8/23) by Susantitaphong et al. * | Search strategy of our additional systematic review (2012/8/24–2018/5/1). |
| --- | --- |
| 1. exp Renal Insufficiency, Acute/ 2. (acute renal failure$ or acute kidney failure$).tw. 3. (arf or akf).tw. 4. (acute renal insufficiency$ or acute kidney insufficiency$).tw. 5. (acute tubular necrosis or ATN).tw. 6. (acute kidney injur$ or acute renal injur$ or AKI).tw. 7. or/1-6 8. risk.tw 9. injury.tw 10. failure.tw 11. and/8-10 12. rifle.tw 13. kidney disease.tw 14. improving global outcomes.tw 15. and/14-15 16. kdigo.tw 17. or/11-12 18. or/15-16 19. acute kidney injury network.tw 20. or/17-19 21. and/ 7&20 | 1. (acute renal failure[tw]) OR arf[tw] 2. (acute kidney failure[tw]) OR Akf[tw] 3. (acute renal insufficiency[tw]) 4. (acute kidney insufficiency[tw]) 5. (acute tubular necrosis[tw]) OR atn[tw] 6. (acute renal injury[tw]) 7. (acute kidney injury[tw]) OR aki[tw] 8. #1 OR #2 OR #3 OR #4 OR #5 OR #6 OR #7 9. (acute kidney injury network[tw]) 10. ((kidney disease[tw]) AND (improving global outcomes[tw])) OR kdigo[tw] 11. (risk[tw] AND injury[tw] AND failure[tw]) OR rifle[tw] 12. #9 OR #10 OR #11 13. #8 AND #12 |

***,** cited from *Clin J Am Soc Nephrol* 8: 1482–1493, 2013.

**Table S2. Complete reference list of the included studies**

1. Ahlstrom A, Kuitunen A, Peltonen S, Hynninen M, Tallgren M, Aaltonen J, Pettila V: Comparison of 2 acute renal failure severity scores to general scoring systems in the critically ill. *Am J Kidney Dis.* 48**:** 262-268, 2006

2. Hoste EA, Clermont G, Kersten A, Venkataraman R, Angus DC, De Bacquer D, Kellum JA: RIFLE criteria for acute kidney injury are associated with hospital mortality in critically ill patients: a cohort analysis. *Crit Care.* 10**:** R73, 2006

3. Akcan-Arikan A, Zappitelli M, Loftis LL, Washburn KK, Jefferson LS, Goldstein SL: Modified RIFLE criteria in critically ill children with acute kidney injury. *Kidney Int.* 71**:** 1028-1035, 2007

4. Ostermann M, Chang RW: Acute kidney injury in the intensive care unit according to RIFLE. *Crit Care Med.* 35**:** 1837-1843; quiz 1852, 2007

5. Zappitelli M, Washburn KK, Arikan AA, Loftis L, Ma Q, Devarajan P, Parikh CR, Goldstein SL: Urine neutrophil gelatinase-associated lipocalin is an early marker of acute kidney injury in critically ill children: a prospective cohort study. *Crit Care.* 11**:** R84, 2007

6. Bagshaw SM, George C, Dinu I, Bellomo R: A multi-centre evaluation of the RIFLE criteria for early acute kidney injury in critically ill patients. *Nephrol Dial Transplant.* 23**:** 1203-1210, 2008

7. Bagshaw SM, George C, Gibney RT, Bellomo R: A multi-center evaluation of early acute kidney injury in critically ill trauma patients. *Ren Fail.* 30**:** 581-589, 2008

8. Covic A, Schiller A, Mardare NG, Petrica L, Petrica M, Mihaescu A, Posta N: The impact of acute kidney injury on short-term survival in an Eastern European population with stroke. *Nephrol Dial Transplant.* 23**:** 2228-2234, 2008

9. Lassnigg A, Schmid ER, Hiesmayr M, Falk C, Druml W, Bauer P, Schmidlin D: Impact of minimal increases in serum creatinine on outcome in patients after cardiothoracic surgery: do we have to revise current definitions of acute renal failure? *Crit Care Med.* 36**:** 1129-1137, 2008

10. Lopes JA, Fernandes P, Jorge S, Goncalves S, Alvarez A, Costa e Silva Z, Franca C, Prata MM: Acute kidney injury in intensive care unit patients: a comparison between the RIFLE and the Acute Kidney Injury Network classifications. *Crit Care.* 12**:** R110, 2008

11. Nickolas TL, O'Rourke MJ, Yang J, Sise ME, Canetta PA, Barasch N, Buchen C, Khan F, Mori K, Giglio J, Devarajan P, Barasch J: Sensitivity and specificity of a single emergency department measurement of urinary neutrophil gelatinase-associated lipocalin for diagnosing acute kidney injury. *Ann Intern Med.* 148**:** 810-819, 2008

12. Ostermann M, Chang R: Correlation between the AKI classification and outcome. *Crit Care.* 12**:** R144, 2008

13. Perez Valdivieso JR, Bes-Rastrollo M, Monedero P, De Irala J, Lavilla FJ: Evaluation of the prognostic value of the risk, injury, failure, loss and end-stage renal failure (RIFLE) criteria for acute kidney injury. *Nephrology (Carlton).* 13**:** 361-366, 2008

14. Plotz FB, Bouma AB, van Wijk JA, Kneyber MC, Bokenkamp A: Pediatric acute kidney injury in the ICU: an independent evaluation of pRIFLE criteria. *Intensive Care Med.* 34**:** 1713-1717, 2008

15. Abelha FJ, Botelho M, Fernandes V, Barros H: Determinants of postoperative acute kidney injury. *Crit Care.* 13**:** R79, 2009

16. Bagshaw SM, Lapinsky S, Dial S, Arabi Y, Dodek P, Wood G, Ellis P, Guzman J, Marshall J, Parrillo JE, Skrobik Y, Kumar A: Acute kidney injury in septic shock: clinical outcomes and impact of duration of hypotension prior to initiation of antimicrobial therapy. *Intensive Care Med.* 35**:** 871-881, 2009

17. Cartin-Ceba R, Haugen EN, Iscimen R, Trillo-Alvarez C, Juncos L, Gajic O: Evaluation of "Loss" and "End stage renal disease" after acute kidney injury defined by the Risk, Injury, Failure, Loss and ESRD classification in critically ill patients. *Intensive Care Med.* 35**:** 2087-2095, 2009

18. Costantini TW, Fraga G, Fortlage D, Wynn S, Fraga A, Lee J, Doucet J, Bansal V, Coimbra R: Redefining renal dysfunction in trauma: implementation of the Acute Kidney Injury Network staging system. *J Trauma.* 67**:** 283-287; discussion 287-288, 2009

19. Joannidis M, Metnitz B, Bauer P, Schusterschitz N, Moreno R, Druml W, Metnitz PG: Acute kidney injury in critically ill patients classified by AKIN versus RIFLE using the SAPS 3 database. *Intensive Care Med.* 35**:** 1692-1702, 2009

20. Machado MN, Miranda RC, Takakura IT, Palmegiani E, Santos CA, Oliveira MA, Mouco OM, Hernandes ME, Lemos MA, Maia LN: Acute kidney injury after on-pump coronary artery bypass graft surgery. *Arq Bras Cardiol.* 93**:** 247-252, 2009

21. Metz LI, LeBeau ME, Zlabek JA, Mathiason MA: Acute renal failure in patients undergoing cardiothoracic surgery in a community hospital. *WMJ.* 108**:** 109-114, 2009

22. Slankamenac K, Breitenstein S, Held U, Beck-Schimmer B, Puhan MA, Clavien PA: Development and validation of a prediction score for postoperative acute renal failure following liver resection. *Ann Surg.* 250**:** 720-728, 2009

23. Tsagalis G, Akrivos T, Alevizaki M, Manios E, Theodorakis M, Laggouranis A, Vemmos KN: Long-term prognosis of acute kidney injury after first acute stroke. *Clin J Am Soc Nephrol.* 4**:** 616-622, 2009

24. Wu CT, Huang JL, Lin JJ, Hsia SH: Factors associated with nontraumatic rhabdomyolysis and acute renal failure of children in Taiwan population. *Pediatr Emerg Care.* 25**:** 657-660, 2009

25. Yuan F, Hou FF, Wu Q, Chen PY, Xie D, Zhang X: Natural history and impact on outcomes of acute kidney injury in patients with road traffic injury. *Clin Nephrol.* 71**:** 669-679, 2009

26. Zappitelli M, Bernier PL, Saczkowski RS, Tchervenkov CI, Gottesman R, Dancea A, Hyder A, Alkandari O: A small post-operative rise in serum creatinine predicts acute kidney injury in children undergoing cardiac surgery. *Kidney Int.* 76**:** 885-892, 2009

27. Akram AR, Singanayagam A, Choudhury G, Mandal P, Chalmers JD, Hill AT: Incidence and prognostic implications of acute kidney injury on admission in patients with community-acquired pneumonia. *Chest.* 138**:** 825-832, 2010

28. Bihorac A, Delano MJ, Schold JD, Lopez MC, Nathens AB, Maier RV, Layon AJ, Baker HV, Moldawer LL: Incidence, clinical predictors, genomics, and outcome of acute kidney injury among trauma patients. *Ann Surg.* 252**:** 158-165, 2010

29. Brown JR, Kramer RS, Coca SG, Parikh CR: Duration of acute kidney injury impacts long-term survival after cardiac surgery. *Ann Thorac Surg.* 90**:** 1142-1148, 2010

30. D'Onofrio A, Cruz D, Bolgan I, Auriemma S, Cresce GD, Fabbri A, Ronco C: RIFLE criteria for cardiac surgery-associated acute kidney injury: risk factors and outcomes. *Congest Heart Fail.* 16 Suppl 1**:** S32-36, 2010

31. Gordon AC, Russell JA, Walley KR, Singer J, Ayers D, Storms MM, Holmes CL, Hebert PC, Cooper DJ, Mehta S, Granton JT, Cook DJ, Presneill JJ: The effects of vasopressin on acute kidney injury in septic shock. *Intensive Care Med.* 36**:** 83-91, 2010

32. Kwon SH, Noh H, Jeon JS, Kim Y, Han DC: An assessment of AKIN criteria for hospital-acquired acute kidney injury: a prospective observational cohort study. *Nephron Clin Pract.* 116**:** c217-223, 2010

33. Lafrance JP, Miller DR: Defining acute kidney injury in database studies: the effects of varying the baseline kidney function assessment period and considering CKD status. *Am J Kidney Dis.* 56**:** 651-660, 2010

34. Mitter N, Shah A, Yuh D, Dodd OJ, Thompson RE, Cameron D, Hogue CW: Renal injury is associated with operative mortality after cardiac surgery for women and men. *J Thorac Cardiovasc Surg.* 140**:** 1367-1373, 2010

35. Robert AM, Kramer RS, Dacey LJ, Charlesworth DC, Leavitt BJ, Helm RE, Hernandez F, Sardella GL, Frumiento C, Likosky DS, Brown JR: Cardiac surgery-associated acute kidney injury: a comparison of two consensus criteria. *Ann Thorac Surg.* 90**:** 1939-1943, 2010

36. Schneider J, Khemani R, Grushkin C, Bart R: Serum creatinine as stratified in the RIFLE score for acute kidney injury is associated with mortality and length of stay for children in the pediatric intensive care unit. *Crit Care Med.* 38**:** 933-939, 2010

37. Silva Junior GB, Liborio AB, Mota RM, Abreu KL, Silva AE, Araujo SM, Daher EF: Acute kidney injury in AIDS: frequency, RIFLE classification and outcome. *Braz J Med Biol Res.* 43**:** 1102-1108, 2010

38. Szczech LA, Granger CB, Dasta JF, Amin A, Peacock WF, McCullough PA, Devlin JW, Weir MR, Katz JN, Anderson FA, Jr., Wyman A, Varon J: Acute kidney injury and cardiovascular outcomes in acute severe hypertension. *Circulation.* 121**:** 2183-2191, 2010

39. Uchino S, Bellomo R, Bagshaw SM, Goldsmith D: Transient azotaemia is associated with a high risk of death in hospitalized patients. *Nephrol Dial Transplant.* 25**:** 1833-1839, 2010

40. Alkandari O, Eddington KA, Hyder A, Gauvin F, Ducruet T, Gottesman R, Phan V, Zappitelli M: Acute kidney injury is an independent risk factor for pediatric intensive care unit mortality, longer length of stay and prolonged mechanical ventilation in critically ill children: a two-center retrospective cohort study. *Crit Care.* 15**:** R146, 2011

41. Clec'h C, Gonzalez F, Lautrette A, Nguile-Makao M, Garrouste-Orgeas M, Jamali S, Golgran-Toledano D, Descorps-Declere A, Chemouni F, Hamidfar-Roy R, Azoulay E, Timsit JF: Multiple-center evaluation of mortality associated with acute kidney injury in critically ill patients: a competing risks analysis. *Crit Care.* 15**:** R128, 2011

42. de Geus HR, Bakker J, Lesaffre EM, le Noble JL: Neutrophil gelatinase-associated lipocalin at ICU admission predicts for acute kidney injury in adult patients. *Am J Respir Crit Care Med.* 183**:** 907-914, 2011

43. Englberger L, Suri RM, Greason KL, Burkhart HM, Sundt TM, 3rd, Daly RC, Schaff HV: Deep hypothermic circulatory arrest is not a risk factor for acute kidney injury in thoracic aortic surgery. *J Thorac Cardiovasc Surg.* 141**:** 552-558, 2011

44. Englberger L, Suri RM, Li Z, Casey ET, Daly RC, Dearani JA, Schaff HV: Clinical accuracy of RIFLE and Acute Kidney Injury Network (AKIN) criteria for acute kidney injury in patients undergoing cardiac surgery. *Crit Care.* 15**:** R16, 2011

45. Fonseca Ruiz NJ, Castro DP, Guerra AM, Saldarriaga FM, Hernandez JD: Renal injury study in critical ill patients in accordance with the new definition given by the Acute Kidney Injury Network. *J Crit Care.* 26**:** 206-212, 2011

46. Garzotto F, Piccinni P, Cruz D, Gramaticopolo S, Dal Santo M, Aneloni G, Kim JC, Rocco M, Alessandri E, Giunta F, Michetti V, Iannuzzi M, Belluomo Anello C, Brienza N, Carlini M, Pelaia P, Gabbanelli V, Ronco C: RIFLE-based data collection/management system applied to a prospective cohort multicenter Italian study on the epidemiology of acute kidney injury in the intensive care unit. *Blood Purif.* 31**:** 159-171, 2011

47. Krawczeski CD, Woo JG, Wang Y, Bennett MR, Ma Q, Devarajan P: Neutrophil gelatinase-associated lipocalin concentrations predict development of acute kidney injury in neonates and children after cardiopulmonary bypass. *J Pediatr.* 158**:** 1009-1015.e1001, 2011

48. Licker M, Cartier V, Robert J, Diaper J, Villiger Y, Tschopp JM, Inan C: Risk factors of acute kidney injury according to RIFLE criteria after lung cancer surgery. *Ann Thorac Surg.* 91**:** 844-850, 2011

49. Lombardi R, Nin N, Lorente JA, Frutos-Vivar F, Ferguson ND, Hurtado J, Apezteguia C, Desmery P, Raymondos K, Tomicic V, Cakar N, Gonzalez M, Elizalde J, Nightingale P, Abroug F, Jibaja M, Arabi Y, Moreno R, Matamis D, Anzueto A, Esteban A: An assessment of the Acute Kidney Injury Network creatinine-based criteria in patients submitted to mechanical ventilation. *Clin J Am Soc Nephrol.* 6**:** 1547-1555, 2011

50. Mandelbaum T, Scott DJ, Lee J, Mark RG, Malhotra A, Waikar SS, Howell MD, Talmor D: Outcome of critically ill patients with acute kidney injury using the Acute Kidney Injury Network criteria. *Crit Care Med.* 39**:** 2659-2664, 2011

51. Martin-Loeches I, Papiol E, Rodriguez A, Diaz E, Zaragoza R, Granada RM, Socias L, Bonastre J, Valverdu M, Pozo JC, Luque P, Julia-Narvaez JA, Cordero L, Albaya A, Seron D, Rello J: Acute kidney injury in critical ill patients affected by influenza A (H1N1) virus infection. *Crit Care.* 15**:** R66, 2011

52. Meier P, Bonfils RM, Vogt B, Burnand B, Burnier M: Referral patterns and outcomes in noncritically ill patients with hospital-acquired acute kidney injury. *Clin J Am Soc Nephrol.* 6**:** 2215-2225, 2011

53. Pannu N, James M, Hemmelgarn BR, Dong J, Tonelli M, Klarenbach S: Modification of outcomes after acute kidney injury by the presence of CKD. *Am J Kidney Dis.* 58**:** 206-213, 2011

54. Pettila V, Webb SA, Bailey M, Howe B, Seppelt IM, Bellomo R: Acute kidney injury in patients with influenza A (H1N1) 2009. *Intensive Care Med.* 37**:** 763-767, 2011

55. Ried M, Puehler T, Haneya A, Schmid C, Diez C: Acute kidney injury in septua- and octogenarians after cardiac surgery. *BMC Cardiovasc Disord.* 11**:** 52, 2011

56. An JN, Lee JP, Jeon HJ, Kim DH, Oh YK, Kim YS, Lim CS: Severe hyperkalemia requiring hospitalization: predictors of mortality. *Crit Care.* 16**:** R225, 2012

57. Aydin SI, Seiden HS, Blaufox AD, Parnell VA, Choudhury T, Punnoose A, Schneider J: Acute kidney injury after surgery for congenital heart disease. *Ann Thorac Surg.* 94**:** 1589-1595, 2012

58. Blinder JJ, Goldstein SL, Lee VV, Baycroft A, Fraser CD, Nelson D, Jefferies JL: Congenital heart surgery in infants: effects of acute kidney injury on outcomes. *J Thorac Cardiovasc Surg.* 143**:** 368-374, 2012

59. Fox CS, Muntner P, Chen AY, Alexander KP, Roe MT, Wiviott SD: Short-term outcomes of acute myocardial infarction in patients with acute kidney injury: a report from the national cardiovascular data registry. *Circulation.* 125**:** 497-504, 2012

60. Haase M, Bellomo R, Story D, Letis A, Klemz K, Matalanis G, Seevanayagam S, Dragun D, Seeliger E, Mertens PR, Haase-Fielitz A: Effect of mean arterial pressure, haemoglobin and blood transfusion during cardiopulmonary bypass on post-operative acute kidney injury. *Nephrol Dial Transplant.* 27**:** 153-160, 2012

61. Ishikawa S, Griesdale DE, Lohser J: Acute kidney injury after lung resection surgery: incidence and perioperative risk factors. *Anesth Analg.* 114**:** 1256-1262, 2012

62. Kavaz A, Ozcakar ZB, Kendirli T, Ozturk BB, Ekim M, Yalcinkaya F: Acute kidney injury in a paediatric intensive care unit: comparison of the pRIFLE and AKIN criteria. *Acta Paediatr.* 101**:** e126-129, 2012

63. Lee EH, Baek SH, Chin JH, Choi DK, Son HJ, Kim WJ, Hahm KD, Sim JY, Choi IC: Preoperative hypoalbuminemia is a major risk factor for acute kidney injury following off-pump coronary artery bypass surgery. *Intensive Care Med.* 38**:** 1478-1486, 2012

64. Liborio AB, Rocha NA, Oliveira MJ, Franco LF, Aguiar GB, Pimentel RS, Abreu KL, Silva GB, Jr., Daher EF: Acute kidney injury in children with visceral leishmaniasis. *Pediatr Infect Dis J.* 31**:** 451-454, 2012

65. Nuis RJ, Rodes-Cabau J, Sinning JM, van Garsse L, Kefer J, Bosmans J, Dager AE, van Mieghem N, Urena M, Nickenig G, Werner N, Maessen J, Astarci P, Perez S, Benitez LM, Dumont E, van Domburg RT, de Jaegere PP: Blood transfusion and the risk of acute kidney injury after transcatheter aortic valve implantation. *Circ Cardiovasc Interv.* 5**:** 680-688, 2012

66. Odutayo A, Adhikari NK, Barton J, Burns KE, Friedrich JO, Klein D, Lapinsky S, Litwin S, Meret A, Moineddin R, Richardson B, Richardson R, Zaltzman A, Hladunewich M, Wald R: Epidemiology of acute kidney injury in Canadian critical care units: a prospective cohort study. *Can J Anaesth.* 59**:** 934-942, 2012

67. Parolari A, Pesce LL, Pacini D, Mazzanti V, Salis S, Sciacovelli C, Rossi F, Alamanni F: Risk factors for perioperative acute kidney injury after adult cardiac surgery: role of perioperative management. *Ann Thorac Surg.* 93**:** 584-591, 2012

68. Prodhan P, McCage LS, Stroud MH, Gossett J, Garcia X, Bhutta AT, Schexnayder S, Maxson RT, Blaszak RT: Acute kidney injury is associated with increased in-hospital mortality in mechanically ventilated children with trauma. *J Trauma Acute Care Surg.* 73**:** 832-837, 2012

69. Ryden L, Ahnve S, Bell M, Hammar N, Ivert T, Holzmann MJ: Acute kidney injury following coronary artery bypass grafting: early mortality and postoperative complications. *Scand Cardiovasc J.* 46**:** 114-120, 2012

70. Selby NM, Crowley L, Fluck RJ, McIntyre CW, Monaghan J, Lawson N, Kolhe NV: Use of electronic results reporting to diagnose and monitor AKI in hospitalized patients. *Clin J Am Soc Nephrol.* 7**:** 533-540, 2012

71. Sigurdsson MI, Vesteinsdottir IO, Sigvaldason K, Helgadottir S, Indridason OS, Sigurdsson GH: Acute kidney injury in intensive care units according to RIFLE classification: a population-based study. *Acta Anaesthesiol Scand.* 56**:** 1291-1297, 2012

72. Sims AJ, Hussein HK, Prabhu M, Kanagasundaram NS: Are surrogate assumptions and use of diuretics associated with diagnosis and staging of acute kidney injury after cardiac surgery? *Clin J Am Soc Nephrol.* 7**:** 15-23, 2012

73. Stewart IJ, Tilley MA, Cotant CL, Aden JK, Gisler C, Kwan HK, McCorcle J, Renz EM, Chung KK: Association of AKI with adverse outcomes in burned military casualties. *Clin J Am Soc Nephrol.* 7**:** 199-206, 2012

74. Toth R, Breuer T, Cserep Z, Lex D, Fazekas L, Sapi E, Szatmari A, Gal J, Szekely A: Acute kidney injury is associated with higher morbidity and resource utilization in pediatric patients undergoing heart surgery. *Ann Thorac Surg.* 93**:** 1984-1990, 2012

75. Uchino S, Bellomo R, Goldsmith D: The meaning of the blood urea nitrogen/creatinine ratio in acute kidney injury. *Clin Kidney J.* 5**:** 187-191, 2012

76. Wehbe E, Brock R, Budev M, Xu M, Demirjian S, Schreiber MJ, Jr., Stephany B: Short-term and long-term outcomes of acute kidney injury after lung transplantation. *J Heart Lung Transplant.* 31**:** 244-251, 2012

77. Aitken E, Carruthers C, Gall L, Kerr L, Geddes C, Kingsmore D: Acute kidney injury: outcomes and quality of care. *QJM.* 106**:** 323-332, 2013

78. Alabbas A, Campbell A, Skippen P, Human D, Matsell D, Mammen C: Epidemiology of cardiac surgery-associated acute kidney injury in neonates: a retrospective study. *Pediatr Nephrol.* 28**:** 1127-1134, 2013

79. Al-Dorzi HM, Al-Heijan A, Tamim HM, Al-Ghamdi G, Arabi YM: Renal failure as a risk factor for venous thromboembolism in critically Ill patients: a cohort study. *Thromb Res.* 132**:** 671-675, 2013

80. Bagshaw SM, Sood MM, Long J, Fowler RA, Adhikari NK: Acute kidney injury among critically ill patients with pandemic H1N1 influenza A in Canada: cohort study. *BMC Nephrol.* 14**:** 123, 2013

81. Bastin AJ, Ostermann M, Slack AJ, Diller GP, Finney SJ, Evans TW: Acute kidney injury after cardiac surgery according to Risk/Injury/Failure/Loss/End-stage, Acute Kidney Injury Network, and Kidney Disease: Improving Global Outcomes classifications. *J Crit Care.* 28**:** 389-396, 2013

82. Bianchi P, Carboni G, Pesce G, Isgro G, Carlucci C, Frigiola A, Giamberti A, Ranucci M: Cardiac catheterization and postoperative acute kidney failure in congenital heart pediatric patients. *Anesth Analg.* 117**:** 455-461, 2013

83. Bihorac A, Brennan M, Ozrazgat-Baslanti T, Bozorgmehri S, Efron PA, Moore FA, Segal MS, Hobson CE: National surgical quality improvement program underestimates the risk associated with mild and moderate postoperative acute kidney injury. *Crit Care Med.* 41**:** 2570-2583, 2013

84. Bresolin N, Bianchini AP, Haas CA: Pediatric acute kidney injury assessed by pRIFLE as a prognostic factor in the intensive care unit. *Pediatr Nephrol.* 28**:** 485-492, 2013

85. Chao CT, Lin YF, Tsai HB, Wu VC, Ko WJ: Acute kidney injury network staging in geriatric postoperative acute kidney injury patients: shortcomings and improvements. *J Am Coll Surg.* 217**:** 240-250, 2013

86. dos Santos El Halal MG, Carvalho PR: Acute kidney injury according to pediatric RIFLE criteria is associated with negative outcomes after heart surgery in children. *Pediatr Nephrol.* 28**:** 1307-1314, 2013

87. Du B, An Y, Kang Y, Yu X, Zhao M, Ma X, Ai Y, Xu Y, Wang Y, Qian C, Wu D, Sun R, Li S, Hu Z, Cao X, Zhou F, Jiang L, Lin J, Chen E, Qin T, He Z, Zhou L: Characteristics of critically ill patients in ICUs in mainland China. *Crit Care Med.* 41**:** 84-92, 2013

88. Englberger L, Suri RM, Connolly HM, Li Z, Abel MD, Greason KL, Dearani JA, Schaff HV: Increased risk of acute kidney injury in patients undergoing tricuspid valve surgery. *Eur J Cardiothorac Surg.* 43**:** 993-999, 2013

89. Forni LG, Dawes T, Sinclair H, Cheek E, Bewick V, Dennis M, Venn R: Identifying the patient at risk of acute kidney injury: a predictive scoring system for the development of acute kidney injury in acute medical patients. *Nephron Clin Pract.* 123**:** 143-150, 2013

90. Han SS, Kim S, Ahn SY, Lee J, Kim DK, Chin HJ, Chae DW, Na KY: Duration of acute kidney injury and mortality in critically ill patients: a retrospective observational study. *BMC Nephrol.* 14**:** 133, 2013

91. Herrera-Gutierrez ME, Seller-Perez G, Sanchez-Izquierdo-Riera JA, Maynar-Moliner J: Prevalence of acute kidney injury in intensive care units: the "COrte de prevalencia de disFuncion RenAl y DEpuracion en criticos" point-prevalence multicenter study. *J Crit Care.* 28**:** 687-694, 2013

92. Hofhuis JG, van Stel HF, Schrijvers AJ, Rommes JH, Spronk PE: The effect of acute kidney injury on long-term health-related quality of life: a prospective follow-up study. *Crit Care.* 17**:** R17, 2013

93. Hui WF, Chan WK, Miu TY: Acute kidney injury in the paediatric intensive care unit: identification by modified RIFLE criteria. *Hong Kong Med J.* 19**:** 13-19, 2013

94. Kim CS, Oak CY, Kim HY, Kang YU, Choi JS, Bae EH, Ma SK, Kweon SS, Kim SW: Incidence, predictive factors, and clinical outcomes of acute kidney injury after gastric surgery for gastric cancer. *PLoS One.* 8**:** e82289, 2013

95. Kyle UG, Akcan-Arikan A, Orellana RA, Coss-Bu JA: Nutrition support among critically ill children with AKI. *Clin J Am Soc Nephrol.* 8**:** 568-574, 2013

96. Liborio AB, Macedo E, de Queiroz RE, Leite TT, Rocha IC, Freitas IA, Correa LC, Campelo CP, Araujo FS, de Albuquerque CA, Arnaud FC, de Sousa FD, Neves FM: Kidney Disease Improving Global Outcomes or creatinine kinetics criteria in acute kidney injury: a proof of concept study. *Nephrol Dial Transplant.* 28**:** 2779-2787, 2013

97. Lopez-Delgado JC, Esteve F, Torrado H, Rodriguez-Castro D, Carrio ML, Farrero E, Javierre C, Ventura JL, Manez R: Influence of acute kidney injury on short- and long-term outcomes in patients undergoing cardiac surgery: risk factors and prognostic value of a modified RIFLE classification. *Crit Care.* 17**:** R293, 2013

98. Martin SM, Balestracci A, Aprea V, Bolasell C, Wainsztein R, Debaisi G, Roson G: Acute kidney injury in critically ill children: incidence and risk factors for mortality. *Arch Argent Pediatr.* 111**:** 411-416, 2013

99. McMahon GM, Zeng X, Waikar SS: A risk prediction score for kidney failure or mortality in rhabdomyolysis. *JAMA Intern Med.* 173**:** 1821-1828, 2013

100. Morgan CJ, Zappitelli M, Robertson CM, Alton GY, Sauve RS, Joffe AR, Ross DB, Rebeyka IM: Risk factors for and outcomes of acute kidney injury in neonates undergoing complex cardiac surgery. *J Pediatr.* 162**:** 120-127.e121, 2013

101. Newland RF, Tully PJ, Baker RA: Hyperthermic perfusion during cardiopulmonary bypass and postoperative temperature are independent predictors of acute kidney injury following cardiac surgery. *Perfusion.* 28**:** 223-231, 2013

102. Nisula S, Kaukonen KM, Vaara ST, Korhonen AM, Poukkanen M, Karlsson S, Haapio M, Inkinen O, Parviainen I, Suojaranta-Ylinen R, Laurila JJ, Tenhunen J, Reinikainen M, Ala-Kokko T, Ruokonen E, Kuitunen A, Pettila V: Incidence, risk factors and 90-day mortality of patients with acute kidney injury in Finnish intensive care units: the FINNAKI study. *Intensive Care Med.* 39**:** 420-428, 2013

103. Podoll AS, Kozar R, Holcomb JB, Finkel KW: Incidence and outcome of early acute kidney injury in critically-ill trauma patients. *PLoS One.* 8**:** e77376, 2013

104. Poukkanen M, Vaara ST, Pettila V, Kaukonen KM, Korhonen AM, Hovilehto S, Inkinen O, Laru-Sompa R, Kaminski T, Reinikainen M, Lund V, Karlsson S: Acute kidney injury in patients with severe sepsis in Finnish Intensive Care Units. *Acta Anaesthesiol Scand.* 57**:** 863-872, 2013

105. Ricci Z, Di Nardo M, Iacoella C, Netto R, Picca S, Cogo P: Pediatric RIFLE for acute kidney injury diagnosis and prognosis for children undergoing cardiac surgery: a single-center prospective observational study. *Pediatr Cardiol.* 34**:** 1404-1408, 2013

106. Rodrigues FB, Bruetto RG, Torres US, Otaviano AP, Zanetta DM, Burdmann EA: Incidence and mortality of acute kidney injury after myocardial infarction: a comparison between KDIGO and RIFLE criteria. *PLoS One.* 8**:** e69998, 2013

107. Roy AK, Mc Gorrian C, Treacy C, Kavanaugh E, Brennan A, Mahon NG, Murray PT: A Comparison of Traditional and Novel Definitions (RIFLE, AKIN, and KDIGO) of Acute Kidney Injury for the Prediction of Outcomes in Acute Decompensated Heart Failure. *Cardiorenal Med.* 3**:** 26-37, 2013

108. Salahudeen AK, Doshi SM, Pawar T, Nowshad G, Lahoti A, Shah P: Incidence rate, clinical correlates, and outcomes of AKI in patients admitted to a comprehensive cancer center. *Clin J Am Soc Nephrol.* 8**:** 347-354, 2013

109. Selewski DT, Jordan BK, Askenazi DJ, Dechert RE, Sarkar S: Acute kidney injury in asphyxiated newborns treated with therapeutic hypothermia. *J Pediatr.* 162**:** 725-729.e721, 2013

110. Shirakabe A, Hata N, Kobayashi N, Shinada T, Tomita K, Tsurumi M, Matsushita M, Okazaki H, Yamamoto Y, Yokoyama S, Asai K, Mizuno K: Prognostic impact of acute kidney injury in patients with acute decompensated heart failure. *Circ J.* 77**:** 687-696, 2013

111. Soler YA, Nieves-Plaza M, Prieto M, Garcia-De Jesus R, Suarez-Rivera M: Pediatric Risk, Injury, Failure, Loss, End-Stage renal disease score identifies acute kidney injury and predicts mortality in critically ill children: a prospective study. *Pediatr Crit Care Med.* 14**:** e189-195, 2013

112. Soto K, Papoila AL, Coelho S, Bennett M, Ma Q, Rodrigues B, Fidalgo P, Frade F, Devarajan P: Plasma NGAL for the diagnosis of AKI in patients admitted from the emergency department setting. *Clin J Am Soc Nephrol.* 8**:** 2053-2063, 2013

113. Taylor ML, Carmona F, Thiagarajan RR, Westgate L, Ferguson MA, del Nido PJ, Rajagopal SK: Mild postoperative acute kidney injury and outcomes after surgery for congenital heart disease. *J Thorac Cardiovasc Surg.* 146**:** 146-152, 2013

114. Teixeira C, Garzotto F, Piccinni P, Brienza N, Iannuzzi M, Gramaticopolo S, Forfori F, Pelaia P, Rocco M, Ronco C, Anello CB, Bove T, Carlini M, Michetti V, Cruz DN: Fluid balance and urine volume are independent predictors of mortality in acute kidney injury. *Crit Care.* 17**:** R14, 2013

115. Totapally BR, Machado J, Lee H, Paredes A, Raszynski A: Acute kidney injury during vancomycin therapy in critically ill children. *Pharmacotherapy.* 33**:** 598-602, 2013

116. Valdez GD, Mihos CG, Santana O, Heimowitz TB, Goldszer R, Lamas GA, Lamelas J: Incidence of postoperative acute kidney injury in patients with chronic kidney disease undergoing minimally invasive valve surgery. *J Thorac Cardiovasc Surg.* 146**:** 1488-1493, 2013

117. Wang HE, Jain G, Glassock RJ, Warnock DG: Comparison of absolute serum creatinine changes versus Kidney Disease: Improving Global Outcomes consensus definitions for characterizing stages of acute kidney injury. *Nephrol Dial Transplant.* 28**:** 1447-1454, 2013

118. Wang YN, Cheng H, Yue T, Chen YP: Derivation and validation of a prediction score for acute kidney injury in patients hospitalized with acute heart failure in a Chinese cohort. *Nephrology (Carlton).* 18**:** 489-496, 2013

119. Wen Y, Jiang L, Xu Y, Qian CY, Li SS, Qin TH, Chen EZ, Lin JD, Ai YH, Wu DW, Wang YS, Sun RH, Hu ZJ, Cao XY, Zhou FC, He ZY, Zhou LH, An YZ, Kang Y, Ma XC, Yu XY, Zhao MY, Xi XM, Du B: Prevalence, risk factors, clinical course, and outcome of acute kidney injury in Chinese intensive care units: a prospective cohort study. *Chin Med J (Engl).* 126**:** 4409-4416, 2013

120. Zwiers AJ, de Wildt SN, Hop WC, Dorresteijn EM, Gischler SJ, Tibboel D, Cransberg K: Acute kidney injury is a frequent complication in critically ill neonates receiving extracorporeal membrane oxygenation: a 14-year cohort study. *Crit Care.* 17**:** R151, 2013

121. Alcaraz AJ, Gil-Ruiz MA, Castillo A, Lopez J, Romero C, Fernandez SN, Carrillo A: Postoperative neutrophil gelatinase-associated lipocalin predicts acute kidney injury after pediatric cardiac surgery*. *Pediatr Crit Care Med.* 15**:** 121-130, 2014

122. Bedford M, Stevens PE, Wheeler TW, Farmer CK: What is the real impact of acute kidney injury? *BMC Nephrol.* 15**:** 95, 2014

123. Biteker M, Dayan A, Tekkesin AI, Can MM, Tayci I, Ilhan E, Sahin G: Incidence, risk factors, and outcomes of perioperative acute kidney injury in noncardiac and nonvascular surgery. *Am J Surg.* 207**:** 53-59, 2014

124. Carmody JB, Swanson JR, Rhone ET, Charlton JR: Recognition and reporting of AKI in very low birth weight infants. *Clin J Am Soc Nephrol.* 9**:** 2036-2043, 2014

125. Challiner R, Ritchie JP, Fullwood C, Loughnan P, Hutchison AJ: Incidence and consequence of acute kidney injury in unselected emergency admissions to a large acute UK hospital trust. *BMC Nephrol.* 15**:** 84, 2014

126. Chang CH, Fan PC, Chang MY, Tian YC, Hung CC, Fang JT, Yang CW, Chen YC: Acute kidney injury enhances outcome prediction ability of sequential organ failure assessment score in critically ill patients. *PLoS One.* 9**:** e109649, 2014

127. Cruz DN, Ferrer-Nadal A, Piccinni P, Goldstein SL, Chawla LS, Alessandri E, Belluomo Anello C, Bohannon W, Bove T, Brienza N, Carlini M, Forfori F, Garzotto F, Gramaticopolo S, Iannuzzi M, Montini L, Pelaia P, Ronco C: Utilization of small changes in serum creatinine with clinical risk factors to assess the risk of AKI in critically lll adults. *Clin J Am Soc Nephrol.* 9**:** 663-672, 2014

128. Darmon M, Clec'h C, Adrie C, Argaud L, Allaouchiche B, Azoulay E, Bouadma L, Garrouste-Orgeas M, Haouache H, Schwebel C, Goldgran-Toledano D, Khallel H, Dumenil AS, Jamali S, Souweine B, Zeni F, Cohen Y, Timsit JF: Acute respiratory distress syndrome and risk of AKI among critically ill patients. *Clin J Am Soc Nephrol.* 9**:** 1347-1353, 2014

129. Duthie FA, McGeehan P, Hill S, Phelps R, Kluth DC, Zamvar V, Hughes J, Ferenbach DA: The utility of the additive EuroSCORE, RIFLE and AKIN staging scores in the prediction and diagnosis of acute kidney injury after cardiac surgery. *Nephron Clin Pract.* 128**:** 29-38, 2014

130. Fujii T, Uchino S, Takinami M, Bellomo R: Validation of the Kidney Disease Improving Global Outcomes criteria for AKI and comparison of three criteria in hospitalized patients. *Clin J Am Soc Nephrol.* 9**:** 848-854, 2014

131. Gomez Polo JC, Alcaraz Romero AJ, Gil-Ruiz Gil-Esparza MA, Lopez-Herce Cid J, Garcia San Prudencio M, Fernandez Lafever SN, Carrillo Alvarez A: Morbimortality associated to acute kidney injury in patients admitted to pediatric intensive care units. *Med Intensiva.* 38**:** 430-437, 2014

132. Grams ME, Waikar SS, MacMahon B, Whelton S, Ballew SH, Coresh J: Performance and limitations of administrative data in the identification of AKI. *Clin J Am Soc Nephrol.* 9**:** 682-689, 2014

133. Hobbs H, Bassett P, Wheeler T, Bedford M, Irving J, Stevens PE, Farmer CK: Do acute elevations of serum creatinine in primary care engender an increased mortality risk? *BMC Nephrol.* 15**:** 206, 2014

134. Jang WS, Kim WH, Choi K, Nam J, Jung JC, Kwon BS, Kim GB, Kang HG, Lee JR, Kim YJ: Incidence, risk factors and clinical outcomes for acute kidney injury after aortic arch repair in paediatric patients. *Eur J Cardiothorac Surg.* 45**:** e208-214, 2014

135. Kamal EM, Behery MM, Sayed GA, Abdulatif HK: RIFLE classification and mortality in obstetric patients admitted to the intensive care unit with acute kidney injury: a 3-year prospective study. *Reprod Sci.* 21**:** 1281-1287, 2014

136. Khalil MA, Tan J, Khalil MA, Awan S, Rangasami M: Predictors of hospital stay and mortality in dengue virus infection-experience from Aga Khan University Hospital Pakistan. *BMC Res Notes.* 7**:** 473, 2014

137. Knoderer CA, Nichols KR, Lyon KC, Veverka MM, Wilson AC: Are Elevated Vancomycin Serum Trough Concentrations Achieved Within the First 7 Days of Therapy Associated With Acute Kidney Injury in Children? *J Pediatric Infect Dis Soc.* 3**:** 127-131, 2014

138. Lex DJ, Toth R, Cserep Z, Alexander SI, Breuer T, Sapi E, Szatmari A, Szekely E, Gal J, Szekely A: A comparison of the systems for the identification of postoperative acute kidney injury in pediatric cardiac patients. *Ann Thorac Surg.* 97**:** 202-210, 2014

139. Li Z, Cai L, Liang X, Du Z, Chen Y, An S, Tan N, Xu L, Li R, Li L, Shi W: Identification and predicting short-term prognosis of early cardiorenal syndrome type 1: KDIGO is superior to RIFLE or AKIN. *PLoS One.* 9**:** e114369, 2014

140. Linder A, Fjell C, Levin A, Walley KR, Russell JA, Boyd JH: Small acute increases in serum creatinine are associated with decreased long-term survival in the critically ill. *Am J Respir Crit Care Med.* 189**:** 1075-1081, 2014

141. Luo X, Jiang L, Du B, Wen Y, Wang M, Xi X: A comparison of different diagnostic criteria of acute kidney injury in critically ill patients. *Crit Care.* 18**:** R144, 2014

142. Machado MN, Nakazone MA, Maia LN: Acute kidney injury based on KDIGO (Kidney Disease Improving Global Outcomes) criteria in patients with elevated baseline serum creatinine undergoing cardiac surgery. *Rev Bras Cir Cardiovasc.* 29**:** 299-307, 2014

143. Machado MN, Nakazone MA, Maia LN: Prognostic value of acute kidney injury after cardiac surgery according to kidney disease: improving global outcomes definition and staging (KDIGO) criteria. *PLoS One.* 9**:** e98028, 2014

144. Mariscalco G, Cottini M, Dominici C, Banach M, Piffaretti G, Borsani P, Bruno VD, Corazzari C, Gherli R, Beghi C: The effect of timing of cardiac catheterization on acute kidney injury after cardiac surgery is influenced by the type of operation. *Int J Cardiol.* 173**:** 46-54, 2014

145. Moltrasio M, Cabiati A, Milazzo V, Rubino M, De Metrio M, Discacciati A, Rumi P, Marana I, Marenzi G: B-type natriuretic peptide and risk of acute kidney injury in patients hospitalized with acute coronary syndromes*. *Crit Care Med.* 42**:** 619-624, 2014

146. Naik S, Sharma J, Yengkom R, Kalrao V, Mulay A: Acute kidney injury in critically ill children: Risk factors and outcomes. *Indian J Crit Care Med.* 18**:** 129-133, 2014

147. Ozkaynak B, Kayalar N, Gumus F, Yucel C, Mert B, Boyacioglu K, Erentug V: Time from cardiac catheterization to cardiac surgery: a risk factor for acute kidney injury? *Interact Cardiovasc Thorac Surg.* 18**:** 706-711, 2014

148. Selewski DT, Cornell TT, Heung M, Troost JP, Ehrmann BJ, Lombel RM, Blatt NB, Luckritz K, Hieber S, Gajarski R, Kershaw DB, Shanley TP, Gipson DS: Validation of the KDIGO acute kidney injury criteria in a pediatric critical care population. *Intensive Care Med.* 40**:** 1481-1488, 2014

149. Shacham Y, Leshem-Rubinow E, Steinvil A, Assa EB, Keren G, Roth A, Arbel Y: Renal impairment according to acute kidney injury network criteria among ST elevation myocardial infarction patients undergoing primary percutaneous intervention: a retrospective observational study. *Clin Res Cardiol.* 103**:** 525-532, 2014

150. Shalaby M, Khathlan N, Safder O, Fadel F, Farag YM, Singh AK, Kari JA: Outcome of acute kidney injury in pediatric patients admitted to the intensive care unit. *Clin Nephrol.* 82**:** 379-386, 2014

151. Shinjo H, Sato W, Imai E, Kosugi T, Hayashi H, Nishimura K, Nishiwaki K, Yuzawa Y, Matsuo S, Maruyama S: Comparison of kidney disease: improving global outcomes and acute kidney injury network criteria for assessing patients in intensive care units. *Clin Exp Nephrol.* 18**:** 737-745, 2014

152. Sickeler R, Phillips-Bute B, Kertai MD, Schroder J, Mathew JP, Swaminathan M, Stafford-Smith M: The risk of acute kidney injury with co-occurrence of anemia and hypotension during cardiopulmonary bypass relative to anemia alone. *Ann Thorac Surg.* 97**:** 865-871, 2014

153. Tsai TT, Patel UD, Chang TI, Kennedy KF, Masoudi FA, Matheny ME, Kosiborod M, Amin AP, Messenger JC, Rumsfeld JS, Spertus JA: Contemporary incidence, predictors, and outcomes of acute kidney injury in patients undergoing percutaneous coronary interventions: insights from the NCDR Cath-PCI registry. *JACC Cardiovasc Interv.* 7**:** 1-9, 2014

154. Tsai TT, Patel UD, Chang TI, Kennedy KF, Masoudi FA, Matheny ME, Kosiborod M, Amin AP, Weintraub WS, Curtis JP, Messenger JC, Rumsfeld JS, Spertus JA: Validated contemporary risk model of acute kidney injury in patients undergoing percutaneous coronary interventions: insights from the National Cardiovascular Data Registry Cath-PCI Registry. *J Am Heart Assoc.* 3**:** e001380, 2014

155. Zeng X, McMahon GM, Brunelli SM, Bates DW, Waikar SS: Incidence, outcomes, and comparisons across definitions of AKI in hospitalized individuals. *Clin J Am Soc Nephrol.* 9**:** 12-20, 2014

156. Angeli P, Rodriguez E, Piano S, Ariza X, Morando F, Sola E, Romano A, Garcia E, Pavesi M, Risso A, Gerbes A, Willars C, Bernardi M, Arroyo V, Gines P: Acute kidney injury and acute-on-chronic liver failure classifications in prognosis assessment of patients with acute decompensation of cirrhosis. *Gut.* 64**:** 1616-1622, 2015

157. Cabral FC, Ramos Garcia PC, Mattiello R, Dresser D, Fiori HH, Korb C, Dalcin TC, Piva JP: Influence of Acute Kidney Injury Defined by the Pediatric Risk, Injury, Failure, Loss, End-Stage Renal Disease Score on the Clinical Course of PICU Patients. *Pediatr Crit Care Med.* 16**:** e275-282, 2015

158. Darmon M, Vincent F, Canet E, Mokart D, Pene F, Kouatchet A, Mayaux J, Nyunga M, Bruneel F, Rabbat A, Lebert C, Perez P, Renault A, Meert AP, Benoit D, Hamidfar R, Jourdain M, Schlemmer B, Chevret S, Lemiale V, Azoulay E: Acute kidney injury in critically ill patients with haematological malignancies: results of a multicentre cohort study from the Groupe de Recherche en Reanimation Respiratoire en Onco-Hematologie. *Nephrol Dial Transplant.* 30**:** 2006-2013, 2015

159. Goussot S, Mousson C, Guenancia C, Stamboul K, Brunel P, Brunet D, Touzery C, Cottin Y, Zeller M: N-Terminal Fragment of Pro B-type Natriuretic Peptide as a Marker of Contrast-Induced Nephropathy After Primary Percutaneous Coronary Intervention for ST-Segment Elevation Myocardial Infarction. *Am J Cardiol.* 116**:** 865-871, 2015

160. Harris DG, McCrone MP, Koo G, Weltz AS, Chiu WC, Scalea TM, Diaz JJ, Lissauer ME: Epidemiology and outcomes of acute kidney injury in critically ill surgical patients. *J Crit Care.* 30**:** 102-106, 2015

161. Harris SK, Lewington AJ, Harrison DA, Rowan KM: Relationship between patients' outcomes and the changes in serum creatinine and urine output and RIFLE classification in a large critical care cohort database. *Kidney Int.* 88**:** 369-377, 2015

162. Hobson C, Ozrazgat-Baslanti T, Kuxhausen A, Thottakkara P, Efron PA, Moore FA, Moldawer LL, Segal MS, Bihorac A: Cost and Mortality Associated With Postoperative Acute Kidney Injury. *Ann Surg.* 261**:** 1207-1214, 2015

163. Hoste EA, Bagshaw SM, Bellomo R, Cely CM, Colman R, Cruz DN, Edipidis K, Forni LG, Gomersall CD, Govil D, Honore PM, Joannes-Boyau O, Joannidis M, Korhonen AM, Lavrentieva A, Mehta RL, Palevsky P, Roessler E, Ronco C, Uchino S, Vazquez JA, Vidal Andrade E, Webb S, Kellum JA: Epidemiology of acute kidney injury in critically ill patients: the multinational AKI-EPI study. *Intensive Care Med.* 41**:** 1411-1423, 2015

164. Kandler K, Jensen ME, Nilsson JC, Moller CH, Steinbruchel DA: Arterial pressure during cardiopulmonary bypass is not associated with acute kidney injury. *Acta Anaesthesiol Scand.* 59**:** 625-631, 2015

165. Kellum JA, Sileanu FE, Murugan R, Lucko N, Shaw AD, Clermont G: Classifying AKI by Urine Output versus Serum Creatinine Level. *J Am Soc Nephrol.* 26**:** 2231-2238, 2015

166. Kork F, Balzer F, Spies CD, Wernecke KD, Ginde AA, Jankowski J, Eltzschig HK: Minor Postoperative Increases of Creatinine Are Associated with Higher Mortality and Longer Hospital Length of Stay in Surgical Patients. *Anesthesiology.* 123**:** 1301-1311, 2015

167. Kumar PP, Giri SR, Shaikh FA, Panigrahy N, Chirla D: Safety and efficacy of intravenous colistin in children. *Indian Pediatr.* 52**:** 129-130, 2015

168. Lagos-Arevalo P, Palijan A, Vertullo L, Devarajan P, Bennett MR, Sabbisetti V, Bonventre JV, Ma Q, Gottesman RD, Zappitelli M: Cystatin C in acute kidney injury diagnosis: early biomarker or alternative to serum creatinine? *Pediatr Nephrol.* 30**:** 665-676, 2015

169. Medar SS, Hsu DT, Lamour JM, Aydin SI: Acute Kidney Injury in Pediatric Acute Decompensated Heart Failure. *Pediatr Crit Care Med.* 16**:** 535-541, 2015

170. Morgan DJ, Ho KM: Acute kidney injury in bariatric surgery patients requiring intensive care admission: a state-wide, multicenter, cohort study. *Surg Obes Relat Dis.* 11**:** 1300-1306, 2015

171. Park MH, Shim HS, Kim WH, Kim HJ, Kim DJ, Lee SH, Kim CS, Gwak MS, Kim GS: Clinical Risk Scoring Models for Prediction of Acute Kidney Injury after Living Donor Liver Transplantation: A Retrospective Observational Study. *PLoS One.* 10**:** e0136230, 2015

172. Reilly JP, Anderson BJ, Mangalmurti NS, Nguyen TD, Holena DN, Wu Q, Nguyen ET, Reilly MP, Lanken PN, Christie JD, Meyer NJ, Shashaty MG: The ABO Histo-Blood Group and AKI in Critically Ill Patients with Trauma or Sepsis. *Clin J Am Soc Nephrol.* 10**:** 1911-1920, 2015

173. Sanchez-Pinto LN, Goldstein SL, Schneider JB, Khemani RG: Association Between Progression and Improvement of Acute Kidney Injury and Mortality in Critically Ill Children. *Pediatr Crit Care Med.* 16**:** 703-710, 2015

174. Sang BH, Bang JY, Song JG, Hwang GS: Hypoalbuminemia Within Two Postoperative Days Is an Independent Risk Factor for Acute Kidney Injury Following Living Donor Liver Transplantation: A Propensity Score Analysis of 998 Consecutive Patients. *Crit Care Med.* 43**:** 2552-2561, 2015

175. Sethi SK, Kumar M, Sharma R, Bazaz S, Kher V: Acute kidney injury in children after cardiopulmonary bypass: risk factors and outcome. *Indian Pediatr.* 52**:** 223-226, 2015

176. Shacham Y, Leshem-Rubinow E, Gal-Oz A, Arbel Y, Keren G, Roth A, Steinvil A: Acute Cardio-Renal Syndrome as a Cause for Renal Deterioration Among Myocardial Infarction Patients Treated With Primary Percutaneous Intervention. *Can J Cardiol.* 31**:** 1240-1244, 2015

177. Sileanu FE, Murugan R, Lucko N, Clermont G, Kane-Gill SL, Handler SM, Kellum JA: AKI in low-risk versus high-risk patients in intensive care. *Clin J Am Soc Nephrol.* 10**:** 187-196, 2015

178. Srisawat N, Sileanu FE, Murugan R, Bellomod R, Calzavacca P, Cartin-Ceba R, Cruz D, Finn J, Hoste EE, Kashani K, Ronco C, Webb S, Kellum JA: Variation in risk and mortality of acute kidney injury in critically ill patients: a multicenter study. *Am J Nephrol.* 41**:** 81-88, 2015

179. Sutherland SM, Byrnes JJ, Kothari M, Longhurst CA, Dutta S, Garcia P, Goldstein SL: AKI in hospitalized children: comparing the pRIFLE, AKIN, and KDIGO definitions. *Clin J Am Soc Nephrol.* 10**:** 554-561, 2015

180. Tomozawa A, Ishikawa S, Shiota N, Cholvisudhi P, Makita K: Perioperative risk factors for acute kidney injury after liver resection surgery: an historical cohort study. *Can J Anaesth.* 62**:** 753-761, 2015

181. Tujios SR, Hynan LS, Vazquez MA, Larson AM, Seremba E, Sanders CM, Lee WM: Risk factors and outcomes of acute kidney injury in patients with acute liver failure. *Clin Gastroenterol Hepatol.* 13**:** 352-359, 2015

182. Uzundere O, Memis D, Inal MT, Gultekin A, Turan FN: Factors affecting acute renal failure in intensive care unit and effect of these factors on mortality. 2015

183. Vaught AJ, Ozrazgat-Baslanti T, Javed A, Morgan L, Hobson CE, Bihorac A: Acute kidney injury in major gynaecological surgery: an observational study. *BJOG.* 122**:** 1340-1348, 2015

184. Volpon LC, Sugo EK, Carlotti AP: Diagnostic and prognostic value of serum cystatin C in critically ill children with acute kidney injury. *Pediatr Crit Care Med.* 16**:** e125-131, 2015

185. Wang N, Jiang L, Zhu B, Wen Y, Xi XM: Fluid balance and mortality in critically ill patients with acute kidney injury: a multicenter prospective epidemiological study. *Crit Care.* 19**:** 371, 2015

186. Xu JR, Zhu JM, Jiang J, Ding XQ, Fang Y, Shen B, Liu ZH, Zou JZ, Liu L, Wang CS, Ronco C, Liu H, Teng J: Risk Factors for Long-Term Mortality and Progressive Chronic Kidney Disease Associated With Acute Kidney Injury After Cardiac Surgery. *Medicine (Baltimore).* 94**:** e2025, 2015

187. Xu X, Nie S, Liu Z, Chen C, Xu G, Zha Y, Qian J, Liu B, Han S, Xu A, Xu X, Hou FF: Epidemiology and Clinical Correlates of AKI in Chinese Hospitalized Adults. *Clin J Am Soc Nephrol.* 10**:** 1510-1518, 2015

188. Yang L, Xing G, Wang L, Wu Y, Li S, Xu G, He Q, Chen J, Chen M, Liu X, Zhu Z, Yang L, Lian X, Ding F, Li Y, Wang H, Wang J, Wang R, Mei C, Xu J, Li R, Cao J, Zhang L, Wang Y, Xu J, Bao B, Liu B, Chen H, Li S, Zha Y, Luo Q, Chen D, Shen Y, Liao Y, Zhang Z, Wang X, Zhang K, Liu L, Mao P, Guo C, Li J, Wang Z, Bai S, Shi S, Wang Y, Wang J, Liu Z, Wang F, Huang D, Wang S, Ge S, Shen Q, Zhang P, Wu L, Pan M, Zou X, Zhu P, Zhao J, Zhou M, Yang L, Hu W, Wang J, Liu B, Zhang T, Han J, Wen T, Zhao M, Wang H: Acute kidney injury in China: a cross-sectional survey. *Lancet.* 386**:** 1465-1471, 2015

189. Yousefshahi F, Fakhre Yasseri AM, Barkhordari K, Amini M, Salehi Omran A, Rezaei Hemami M, Asadi M: Incidence and complications of acute kidney injury following coronary artery bypass graft: a retrospective cohort study. *Iran J Kidney Dis.* 9**:** 113-118, 2015

190. Zwiers AJ, de Wildt SN, van Rosmalen J, de Rijke YB, Buijs EA, Tibboel D, Cransberg K: Urinary neutrophil gelatinase-associated lipocalin identifies critically ill young children with acute kidney injury following intensive care admission: a prospective cohort study. *Crit Care.* 19**:** 181, 2015

191. Ahn HJ, Kim JA, Lee AR, Yang M, Jung HJ, Heo B: The Risk of Acute Kidney Injury from Fluid Restriction and Hydroxyethyl Starch in Thoracic Surgery. *Anesth Analg.* 122**:** 186-193, 2016

192. Brown JR, Hisey WM, Marshall EJ, Likosky DS, Nichols EL, Everett AD, Pasquali SK, Jacobs ML, Jacobs JP, Parikh CR: Acute Kidney Injury Severity and Long-Term Readmission and Mortality After Cardiac Surgery. *Ann Thorac Surg.* 102**:** 1482-1489, 2016

193. Cantais A, Hammouda Z, Mory O, Patural H, Stephan JL, Gulyaeva L, Darmon M: Incidence of contrast-induced acute kidney injury in a pediatric setting: a cohort study. *Pediatr Nephrol.* 31**:** 1355-1362, 2016

194. Conroy AL, Hawkes M, Elphinstone RE, Morgan C, Hermann L, Barker KR, Namasopo S, Opoka RO, John CC, Liles WC, Kain KC: Acute Kidney Injury Is Common in Pediatric Severe Malaria and Is Associated With Increased Mortality. *Open Forum Infect Dis.* 3**:** ofw046, 2016

195. de Melo Bezerra Cavalcante CT, Castelo Branco KM, Pinto Junior VC, Meneses GC, de Oliveira Neves FM, de Souza NM, Penaforte KL, Martins AM, Liborio AB: Syndecan-1 improves severe acute kidney injury prediction after pediatric cardiac surgery. *J Thorac Cardiovasc Surg.* 152**:** 178-186.e172, 2016

196. Fitzgerald JC, Basu RK, Akcan-Arikan A, Izquierdo LM, Pineres Olave BE, Hassinger AB, Szczepanska M, Deep A, Williams D, Sapru A, Roy JA, Nadkarni VM, Thomas NJ, Weiss SL, Furth S: Acute Kidney Injury in Pediatric Severe Sepsis: An Independent Risk Factor for Death and New Disability. *Crit Care Med.* 44**:** 2241-2250, 2016

197. Fleming GM, Sahay R, Zappitelli M, King E, Askenazi DJ, Bridges BC, Paden ML, Selewski DT, Cooper DS: The Incidence of Acute Kidney Injury and Its Effect on Neonatal and Pediatric Extracorporeal Membrane Oxygenation Outcomes: A Multicenter Report From the Kidney Intervention During Extracorporeal Membrane Oxygenation Study Group. *Pediatr Crit Care Med.* 17**:** 1157-1169, 2016

198. Grams ME, Sang Y, Coresh J, Ballew S, Matsushita K, Molnar MZ, Szabo Z, Kalantar-Zadeh K, Kovesdy CP: Acute Kidney Injury After Major Surgery: A Retrospective Analysis of Veterans Health Administration Data. *Am J Kidney Dis.* 67**:** 872-880, 2016

199. Gupta S, Sengar GS, Meti PK, Lahoti A, Beniwal M, Kumawat M: Acute kidney injury in Pediatric Intensive Care Unit: Incidence, risk factors, and outcome. *Indian J Crit Care Med.* 20**:** 526-529, 2016

200. Helgadottir S, Sigurdsson MI, Palsson R, Helgason D, Sigurdsson GH, Gudbjartsson T: Renal recovery and long-term survival following acute kidney injury after coronary artery surgery: a nationwide study. *Acta Anaesthesiol Scand.* 60**:** 1230-1240, 2016

201. Huber M, Ozrazgat-Baslanti T, Thottakkara P, Efron PA, Feezor R, Hobson C, Bihorac A: Mortality and Cost of Acute and Chronic Kidney Disease after Vascular Surgery. *Ann Vasc Surg.* 30**:** 72-81.e71-72, 2016

202. Izawa J, Uchino S, Takinami M: A detailed evaluation of the new acute kidney injury criteria by KDIGO in critically ill patients. *J Anesth.* 30**:** 215-222, 2016

203. Jiang W, Teng J, Xu J, Shen B, Wang Y, Fang Y, Zou Z, Jin J, Zhuang Y, Liu L, Luo Z, Wang C, Ding X: Dynamic Predictive Scores for Cardiac Surgery-Associated Acute Kidney Injury. *J Am Heart Assoc.* 5, 2016

204. Jung SY, Park JT, Kwon YE, Kim HW, Ryu GW, Lee SA, Park S, Jhee JH, Oh HJ, Han SH, Yoo TH, Kang SW: Preoperative Low Serum Bicarbonate Levels Predict Acute Kidney Injury After Cardiac Surgery. *Medicine (Baltimore).* 95**:** e3216, 2016

205. Kim K, Joung KW, Ji SM, Kim JY, Lee EH, Chung CH, Choi IC: The effect of coronary angiography timing and use of cardiopulmonary bypass on acute kidney injury after coronary artery bypass graft surgery. *J Thorac Cardiovasc Surg.* 152**:** 254-261.e253, 2016

206. Kovacheva VP, Aglio LS, Boland TA, Mendu ML, Gibbons FK, Christopher KB: Acute Kidney Injury After Craniotomy Is Associated With Increased Mortality: A Cohort Study. *Neurosurgery.* 79**:** 389-396, 2016

207. Kriplani DS, Sethna CB, Leisman DE, Schneider JB: Acute Kidney Injury in Neonates in the PICU. *Pediatr Crit Care Med.* 17**:** e159-164, 2016

208. Long TE, Helgason D, Helgadottir S, Palsson R, Gudbjartsson T, Sigurdsson GH, Indridason OS, Sigurdsson MI: Acute Kidney Injury After Abdominal Surgery: Incidence, Risk Factors, and Outcome. *Anesth Analg.* 122**:** 1912-1920, 2016

209. Mallhi TH, Khan AH, Sarriff A, Adnan AS, Khan YH, Jummaat F: Defining acute kidney injury in dengue viral infection by conventional and novel classification systems (AKIN and RIFLE): a comparative analysis. *Postgrad Med J.* 92**:** 78-86, 2016

210. Marchick MR, Allen BR, Weeks EC, Shuster JJ, Elie MC: The incidence and significance of acute kidney injury following emergent contrast administration in patients with STEMI and stroke. *Intern Emerg Med.* 11**:** 853-857, 2016

211. McGregor TL, Jones DP, Wang L, Danciu I, Bridges BC, Fleming GM, Shirey-Rice J, Chen L, Byrne DW, Van Driest SL: Acute Kidney Injury Incidence in Noncritically Ill Hospitalized Children, Adolescents, and Young Adults: A Retrospective Observational Study. *Am J Kidney Dis.* 67**:** 384-390, 2016

212. Mithiran H, Kunnath Bonney G, Bose S, Subramanian S, Zhe Yan ZN, Zong En SY, Papadimas E, Chauhan I, MacLaren G, Kofidis T: A Score for Predicting Acute Kidney Injury After Coronary Artery Bypass Graft Surgery in an Asian Population. *J Cardiothorac Vasc Anesth.* 30**:** 1296-1301, 2016

213. Newland RF, Baker RA, Mazzone AL, Quinn SS, Chew DP: Rewarming Temperature During Cardiopulmonary Bypass and Acute Kidney Injury: A Multicenter Analysis. *Ann Thorac Surg.* 101**:** 1655-1662, 2016

214. Patel A, Sharma D, Shastri S, Sharma P: Acute renal failure in critically ill newborns increases the risk of death: a prospective observational study from India. *J Matern Fetal Neonatal Med.* 29**:** 2878-2882, 2016

215. Pedersen AB, Christiansen CF, Gammelager H, Kahlert J, Sorensen HT: Risk of acute renal failure and mortality after surgery for a fracture of the hip: a population-based cohort study. *Bone Joint J.* 98-b**:** 1112-1118, 2016

216. Pisitsak C, Chittawatanarat K, Wacharasint P, Chaiwat O, Komonhirun R, Morakul S: Prevalence, Outcomes and Risk factors of Acute Kidney Injury in Surgical Intensive Care Unit: A Multi-Center Thai University-Based Surgical Intensive Care Units Study (THAI-SICU Study). *J Med Assoc Thai.* 99 Suppl 6**:** S193-s200, 2016

217. Prasetyo RV, Saraswati PD, Kurniawan MR, Kushartono H, Soemyarso NA, Azis AL, Noer MS: The use of PELOD score in predicting acute kidney injury in critically ill children. 2016

218. Qin JP, Yu XY, Qian CY, Li SS, Qin TH, Chen EZ, Lin JD, Ai YH, Wu DW, Liu DX, Sun RH, Hu ZJ, Cao XY, Zhou FC, He ZY, Zhou LH, An YZ, Kang Y, Ma XC, Zhao MY, Jiang L, Xu Y, Du B: Value of Kidney Disease Improving Global Outcomes Urine Output Criteria in Critically Ill Patients: A Secondary Analysis of a Multicenter Prospective Cohort Study. *Chin Med J (Engl).* 129**:** 2050-2057, 2016

219. Quan S, Pannu N, Wilson T, Ball C, Tan Z, Tonelli M, Hemmelgarn BR, Dixon E, James MT: Prognostic implications of adding urine output to serum creatinine measurements for staging of acute kidney injury after major surgery: a cohort study. *Nephrol Dial Transplant.* 31**:** 2049-2056, 2016

220. Seelhammer TG, Maile MD, Heung M, Haft JW, Jewell ES, Engoren M: Kinetic estimated glomerular filtration rate and acute kidney injury in cardiac surgery patients. *J Crit Care.* 31**:** 249-254, 2016

221. Shi X, Zhu P, Yan G, Liu C, Zhang C, Huang G, Zhang Y, Yan Z, Wang Y: Clinical characteristics and long-term outcome of acute kidney injury in patients with HBV-related acute-on-chronic liver failure. *J Viral Hepat.* 23**:** 920-929, 2016

222. Shum HP, Kong HH, Chan KC, Yan WW, Chan TM: Septic acute kidney injury in critically ill patients - a single-center study on its incidence, clinical characteristics, and outcome predictors. *Ren Fail.* 38**:** 706-716, 2016

223. Slater MB, Gruneir A, Rochon PA, Howard AW, Koren G, Parshuram CS: Risk Factors of Acute Kidney Injury in Critically Ill Children. *Pediatr Crit Care Med.* 17**:** e391-398, 2016

224. Soliman IW, Frencken JF, Peelen LM, Slooter AJ, Cremer OL, van Delden JJ, van Dijk D, de Lange DW: The predictive value of early acute kidney injury for long-term survival and quality of life of critically ill patients. *Crit Care.* 20**:** 242, 2016

225. Sun YB, Liu BC, Zou Y, Pan JR, Tao Y, Yang M: Risk factors of acute kidney injury after acute myocardial infarction. *Ren Fail.* 38**:** 1353-1358, 2016

226. Volpon LC, Sugo EK, Consulin JC, Tavares TL, Aragon DC, Carlotti AP: Epidemiology and Outcome of Acute Kidney Injury According to Pediatric Risk, Injury, Failure, Loss, End-Stage Renal Disease and Kidney Disease: Improving Global Outcomes Criteria in Critically Ill Children-A Prospective Study. *Pediatr Crit Care Med.* 17**:** e229-238, 2016

227. Wu HC, Lee LC, Wang WJ: Incidence and mortality of postoperative acute kidney injury in non-dialysis patients: comparison between the AKIN and KDIGO criteria. *Ren Fail.* 38**:** 330-339, 2016

228. Zhou J, Liu Y, Tang Y, Liu F, Zhang L, Zeng X, Feng Y, Tao Y, Yang L, Fu P: A comparison of RIFLE, AKIN, KDIGO, and Cys-C criteria for the definition of acute kidney injury in critically ill patients. *Int Urol Nephrol.* 48**:** 125-132, 2016

229. Amathieu R, Al-Khafaji A, Sileanu FE, Foldes E, DeSensi R, Hilmi I, Kellum JA: Significance of oliguria in critically ill patients with chronic liver disease. *Hepatology.* 66**:** 1592-1600, 2017

230. Amin AP, Bach RG, Caruso ML, Kennedy KF, Spertus JA: Association of Variation in Contrast Volume With Acute Kidney Injury in Patients Undergoing Percutaneous Coronary Intervention. *JAMA Cardiol.* 2**:** 1007-1012, 2017

231. Amini S, Abbaspour H, Morovatdar N, Robabi HN, Soltani G, Tashnizi MA: Risk Factors and Outcome of Acute Kidney Injury after Congenital Heart Surgery: A Prospective Observational Study. *Indian J Crit Care Med.* 21**:** 847-851, 2017

232. Arya S, Kumar S, Kaur C, Chellani H: Acute Kidney Injury in Neonatal Sepsis: Risk Factors, Clinical Profile, and Outcome. 2017

233. Bavare AC, Rafie KS, Bastero PX, Hagan JL, Checchia PA: Acute Decompensation in Pediatric Cardiac Patients: Outcomes After Rapid Response Events. *Pediatr Crit Care Med.* 18**:** 414-419, 2017

234. Blinder JJ, Asaro LA, Wypij D, Selewski DT, Agus MSD, Gaies M, Ferguson MA: Acute Kidney Injury After Pediatric Cardiac Surgery: A Secondary Analysis of the Safe Pediatric Euglycemia After Cardiac Surgery Trial. *Pediatr Crit Care Med.* 18**:** 638-646, 2017

235. Carlo WF, Clark ST, Borasino S, Alten JA: Impact of contrast exposure from computed tomography angiography on acute kidney injury after neonatal cardiopulmonary bypass surgery. *Congenit Heart Dis.* 12**:** 540-545, 2017

236. Collister D, Pannu N, Ye F, James M, Hemmelgarn B, Chui B, Manns B, Klarenbach S: Health Care Costs Associated with AKI. *Clin J Am Soc Nephrol.* 12**:** 1733-1743, 2017

237. de Oliveira Marques F, Oliveira SA, de Lima ESPF, Nojoza WG, da Silva Sena M, Ferreira TM, Costa BG, Liborio AB: Kinetic estimated glomerular filtration rate in critically ill patients: beyond the acute kidney injury severity classification system. *Crit Care.* 21**:** 280, 2017

238. Diaz F, Benfield M, Brown L, Hayes L: Fluid overload and outcomes in critically ill children: A single center prospective cohort study. *J Crit Care.* 39**:** 209-213, 2017

239. Dou L, Lan H, Reynolds DJ, Gunderson TM, Kashyap R, Gajic O, Caples S, Li G, Kashani KB: Association between Obstructive Sleep Apnea and Acute Kidney Injury in Critically Ill Patients: A Propensity-Matched Study. *Nephron.* 135**:** 137-146, 2017

240. Downes KJ, Cowden C, Laskin BL, Huang YS, Gong W, Bryan M, Fisher BT, Goldstein SL, Zaoutis TE: Association of Acute Kidney Injury With Concomitant Vancomycin and Piperacillin/Tazobactam Treatment Among Hospitalized Children. *JAMA Pediatr.* 171**:** e173219, 2017

241. Duque-Sosa P, Martinez-Urbistondo D, Echarri G, Callejas R, Iribarren MJ, Rabago G, Monedero P: Perioperative hemoglobin area under the curve is an independent predictor of renal failure after cardiac surgery. Results from a Spanish multicenter retrospective cohort study. *PLoS One.* 12**:** e0172021, 2017

242. Elella RA, Habib E, Mokrusova P, Joseph P, Aldalaty H, Ahmadi MA, Halees ZA: Incidence and outcome of acute kidney injury by the pRIFLE criteria for children receiving extracorporeal membrane oxygenation after heart surgery. *Ann Saudi Med.* 37**:** 201-206, 2017

243. Hamada M, Matsukawa S, Shimizu S, Kai S, Mizota T: Acute kidney injury after pediatric liver transplantation: incidence, risk factors, and association with outcome. *J Anesth.* 31**:** 758-763, 2017

244. Hodgson LE, Dimitrov BD, Roderick PJ, Venn R, Forni LG: Predicting AKI in emergency admissions: an external validation study of the acute kidney injury prediction score (APS). *BMJ Open.* 7**:** e013511, 2017

245. Hwang K, Jang HN, Lee TW, Cho HS, Bae E, Chang SH, Park DJ: Incidence, risk factors and clinical outcomes of acute kidney injury associated with scrub typhus: a retrospective study of 510 consecutive patients in South Korea (2001-2013). *BMJ Open.* 7**:** e013882, 2017

246. Jannot AS, Burgun A, Thervet E, Pallet N: The Diagnosis-Wide Landscape of Hospital-Acquired AKI. *Clin J Am Soc Nephrol.* 12**:** 874-884, 2017

247. Jin K, Murugan R, Sileanu FE, Foldes E, Priyanka P, Clermont G, Kellum JA: Intensive Monitoring of Urine Output Is Associated With Increased Detection of Acute Kidney Injury and Improved Outcomes. *Chest.* 152**:** 972-979, 2017

248. Kaddourah A, Basu RK, Bagshaw SM, Goldstein SL: Epidemiology of Acute Kidney Injury in Critically Ill Children and Young Adults. *N Engl J Med.* 376**:** 11-20, 2017

249. Koeze J, Keus F, Dieperink W, van der Horst IC, Zijlstra JG, van Meurs M: Incidence, timing and outcome of AKI in critically ill patients varies with the definition used and the addition of urine output criteria. *BMC Nephrol.* 18**:** 70, 2017

250. Kumar P, Renuka MK, Kalaiselvan MS, Arunkumar AS: Outcome of Noncardiac Surgical Patients Admitted to a Multidisciplinary Intensive Care Unit. *Indian J Crit Care Med.* 21**:** 17-22, 2017

251. Lee CC, Chan OW, Lai MY, Hsu KH, Wu TW, Lim WH, Wang YC, Lien R: Incidence and outcomes of acute kidney injury in extremely-low-birth-weight infants. *PLoS One.* 12**:** e0187764, 2017

252. Lombardi R, Nin N, Penuelas O, Ferreiro A, Rios F, Marin MC, Raymondos K, Lorente JA, Koh Y, Hurtado J, Gonzalez M, Abroug F, Jibaja M, Arabi Y, Moreno R, Matamis D, Anzueto A, Esteban A: Acute Kidney Injury in Mechanically Ventilated Patients: The Risk Factor Profile Depends on the Timing of Aki Onset. *Shock.* 48**:** 411-417, 2017

253. Malhotra R, Kashani KB, Macedo E, Kim J, Bouchard J, Wynn S, Li G, Ohno-Machado L, Mehta R: A risk prediction score for acute kidney injury in the intensive care unit. *Nephrol Dial Transplant.* 32**:** 814-822, 2017

254. Momeni A, Ali FK, Behvandi B, Ganji F: Evaluation of prevalence and causes of acute kidney injury and its effect on short time mortality in intensive care unit patients. 2017

255. O'Connor ME, Hewson RW, Kirwan CJ, Ackland GL, Pearse RM, Prowle JR: Acute kidney injury and mortality 1 year after major non-cardiac surgery. *Br J Surg.* 104**:** 868-876, 2017

256. Porter CJ, Moppett IK, Juurlink I, Nightingale J, Moran CG, Devonald MA: Acute and chronic kidney disease in elderly patients with hip fracture: prevalence, risk factors and outcome with development and validation of a risk prediction model for acute kidney injury. *BMC Nephrol.* 18**:** 20, 2017

257. Rustagi RS, Arora K, Das RR, Pooni PA, Singh D: Incidence, risk factors and outcome of acute kidney injury in critically ill children - a developing country perspective. *Paediatr Int Child Health.* 37**:** 35-41, 2017

258. Sawhney S, Marks A, Fluck N, Levin A, Prescott G, Black C: Intermediate and Long-term Outcomes of Survivors of Acute Kidney Injury Episodes: A Large Population-Based Cohort Study. *Am J Kidney Dis.* 69**:** 18-28, 2017

259. Serna-Higuita LM, Nieto-Rios JF, Contreras-Saldarriaga JE, Escobar-Catano JF, Gomez-Ramirez LA, Montoya-Giraldo JD, Parra-Rodas E, Parra-Rodas LM, Valderrama-Torres JC, Jaimes F: Risk factors for acute kidney injury in a pediatric intensive care unit: a retrospective cohort study. *Medwave.* 17**:** e6940, 2017

260. Tanyildiz M, Ekim M, Kendirli T, Tutar E, Eyileten Z, Ozcakar ZB, Kavaz A, Yalcinkaya F, Uysalel A, Atalay S: Acute kidney injury in congenital cardiac surgery: Pediatric risk-injury-failure-loss-end-stage renal disease and Acute Kidney Injury Network. *Pediatr Int.* 59**:** 1252-1260, 2017

261. Toyonaga Y, Asayama K, Maehara Y: Impact of systemic inflammatory response syndrome and surgical Apgar score on post-operative acute kidney injury. *Acta Anaesthesiol Scand.* 61**:** 1253-1261, 2017

262. Valle JA, McCoy LA, Maddox TM, Rumsfeld JS, Ho PM, Casserly IP, Nallamothu BK, Roe MT, Tsai TT, Messenger JC: Longitudinal Risk of Adverse Events in Patients With Acute Kidney Injury After Percutaneous Coronary Intervention: Insights From the National Cardiovascular Data Registry. *Circ Cardiovasc Interv.* 10, 2017

263. Wu B, Ma L, Shao Y, Liu S, Yu X, Zhu Y, Xu X, Xing C, Mao H: Effect of Cardiac Surgery-Associated Acute Kidney Injury on Long-Term Outcomes of Chinese Patients: A Historical Cohort Study. *Blood Purif.* 44**:** 227-233, 2017

264. Xie X, Wan X, Ji X, Chen X, Liu J, Chen W, Cao C: Reassessment of Acute Kidney Injury after Cardiac Surgery: A Retrospective Study. *Intern Med.* 56**:** 275-282, 2017

265. Yang X, Chen C, Teng S, Fu X, Zha Y, Liu H, Wang L, Tian J, Zhang X, Liu Y, Nie J, Hou FF: Urinary Matrix Metalloproteinase-7 Predicts Severe AKI and Poor Outcomes after Cardiac Surgery. *J Am Soc Nephrol.* 28**:** 3373-3382, 2017

266. Bakhoum CY, Basalely A, Koppel RI, Sethna CB: Acute kidney injury in preterm infants with necrotizing enterocolitis. *J Matern Fetal Neonatal Med***:** 1-6, 2018

267. Basu RK, Kaddourah A, Goldstein SL: Assessment of a renal angina index for prediction of severe acute kidney injury in critically ill children: a multicentre, multinational, prospective observational study. *Lancet Child Adolesc Health.* 2**:** 112-120, 2018

268. Chowdhary V, Vajpeyajula R, Jain M, Maqsood S, Raina R, Kumar D, Mhanna MJ: Comparison of different definitions of acute kidney injury in extremely low birth weight infants. *Clin Exp Nephrol.* 22**:** 117-125, 2018

269. Criss CN, Selewski DT, Sunkara B, Gish JS, Hsieh L, McLeod JS, Robertson JO, Matusko N, Gadepalli SK: Acute kidney injury in necrotizing enterocolitis predicts mortality. *Pediatr Nephrol.* 33**:** 503-510, 2018

270. Elmas AT, Tabel Y, Ozdemir R: Risk factors and mortality rate in premature babies with acute kidney injury. *J Clin Lab Anal.* 32**:** e22441, 2018

271. Hanoura S, Omar AS, Osman H, Sudarsanan S, Eissa M, Maksoud M, Singh R, Al Khulaifi A: Prevalence and predictors of acute kidney injury after cardiac surgery: A single-centre retrospective study in Qatar. 2018

272. Kamolvisit W, Jaroensri S, Ratchatapantanakorn B, Nakwan N: Factors and Outcomes of Persistent Pulmonary Hypertension of the Newborn Associated with Acute Kidney Injury in Thai Neonates. *Am J Perinatol.* 35**:** 298-304, 2018

273. Kari JA, Alhasan KA, Shalaby MA, Khathlan N, Safdar OY, Al Rezgan SA, El Desoky S, Albanna AS: Outcome of pediatric acute kidney injury: a multicenter prospective cohort study. *Pediatr Nephrol.* 33**:** 335-340, 2018

274. Kim YJ, Sohn CH, Seo DW, Oh BJ, Lim KS, Chang JW, Kim WY: Analysis of the development and progression of carbon monoxide poisoning-related acute kidney injury according to the Kidney Disease Improving Global Outcomes (KDIGO) criteria. *Clin Toxicol (Phila).* 56**:** 759-764, 2018

275. Lal BB, Alam S, Sood V, Rawat D, Khanna R: Profile, risk factors and outcome of acute kidney injury in paediatric acute-on-chronic liver failure. *Liver Int.* 38**:** 1777-1784, 2018

276. Mah KE, Hao S, Sutherland SM, Kwiatkowski DM, Axelrod DM, Almond CS, Krawczeski CD, Shin AY: Fluid overload independent of acute kidney injury predicts poor outcomes in neonates following congenital heart surgery. *Pediatr Nephrol.* 33**:** 511-520, 2018

277. Mishra PK, Luckraz H, Nandi J, Nevill A, Giri R, Panayiotou A, Nicholas J: Long-term quality of life postacute kidney injury in cardiac surgery patients. *Ann Card Anaesth.* 21**:** 41-45, 2018

278. Oh HW, Lee JH, Kim HC, Kim EH, Song IK, Kim HS, Kim JT: The effect of 6% hydroxyethyl starch (130/0.4) on acute kidney injury in paediatric cardiac surgery: a prospective, randomised trial. *Anaesthesia.* 73**:** 205-215, 2018

279. Zhang Y, Jiang L, Wang B, Xi X: Epidemiological characteristics of and risk factors for patients with postoperative acute kidney injury: a multicenter prospective study in 30 Chinese intensive care units. *Int Urol Nephrol.* 50**:** 1319-1328, 2018

280. Zhou H, Wang G, Yang L, Shi S, Li J, Wang M, Zhang C, Li H, Qian X, Sun X, Chang Q, Yu C: Acute Kidney Injury After Total Arch Replacement Combined With Frozen Elephant Trunk Implantation: Incidence, Risk Factors, and Outcome. *J Cardiothorac Vasc Anesth.* 32**:** 2210-2217, 2018
